# Supplementary material for: Vanadia–Zirconia and Vanadia–Hafnia Catalysts for Utilization of Volatile Organic Compound Emissions
Source: MDPI journal article supplement (doi:10.3390/ma14185265), 2021-09-13
Supplement: s1 [file s1]

Supplementary Materials

# Vanadia-Zirconia and Vanadia-Hafnia Catalysts for Utilization of Volatile Organic Compound Emissions

Satu Ojala <sup>1,\*</sup>, Tiina Laitinen <sup>1</sup>, Sian Leneuf de Neufville <sup>2</sup>, Mari Honkanen <sup>3</sup>, Minnamari Vippola <sup>3</sup>, Mika Huuhtanen <sup>1</sup> and Riitta L. Keiski <sup>1</sup>

<sup>1</sup> Environmental and Chemical Engineering, Faculty of Technology, University of Oulu, Finland; [firstname.lastname@oulu.fi](mailto:firstname.lastname@oulu.fi)

<sup>2</sup> Institut Universitaire de Technologie de Poitiers, Université de Poitiers, France; [sianleneuf@gmail.com](mailto:sianleneuf@gmail.com)

<sup>3</sup> Tampere Microscopy Center, Tampere University, Finland; [firstname.lastname@tuni.fi](mailto:firstname.lastname@tuni.fi)

\* Correspondence: [satu.ojala@oulu.fi](mailto:satu.ojala@oulu.fi);

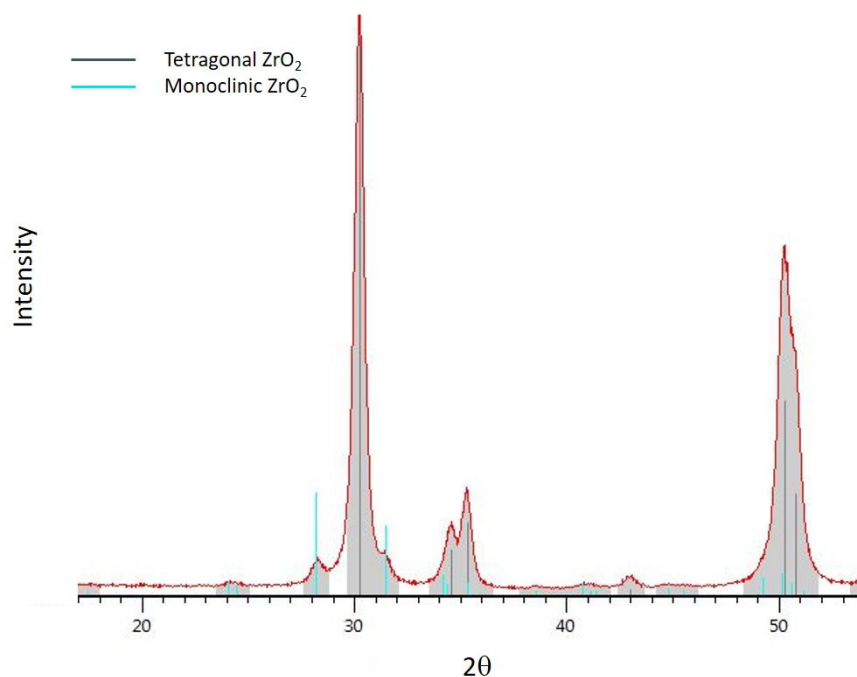

Figure S1: XRD diffractogram of 4VZr SG catalyst with  $2\theta$  range of 27–54°.

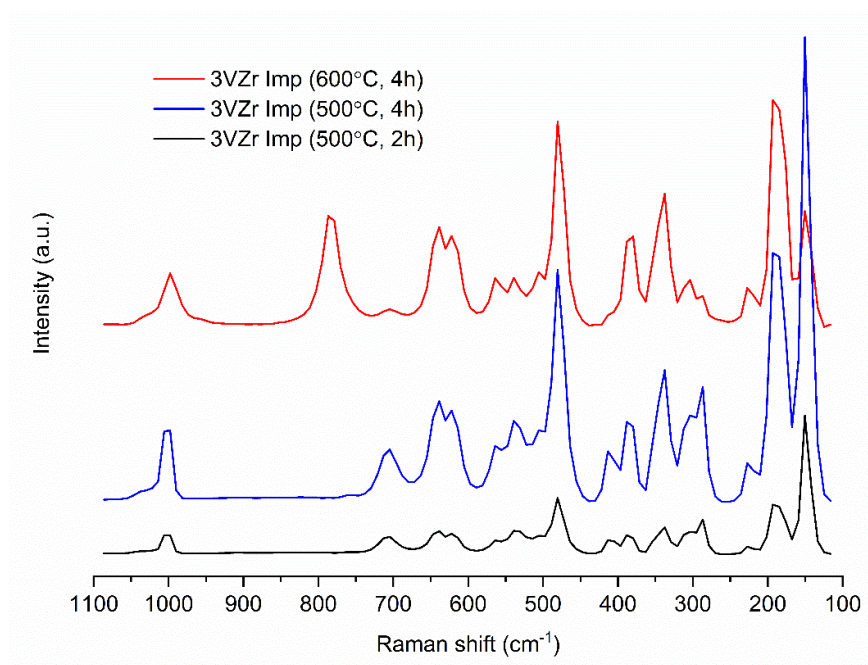

Figure S2: Comparison of Raman spectra of impregnated 3VZr catalysts having different calcination treatments.

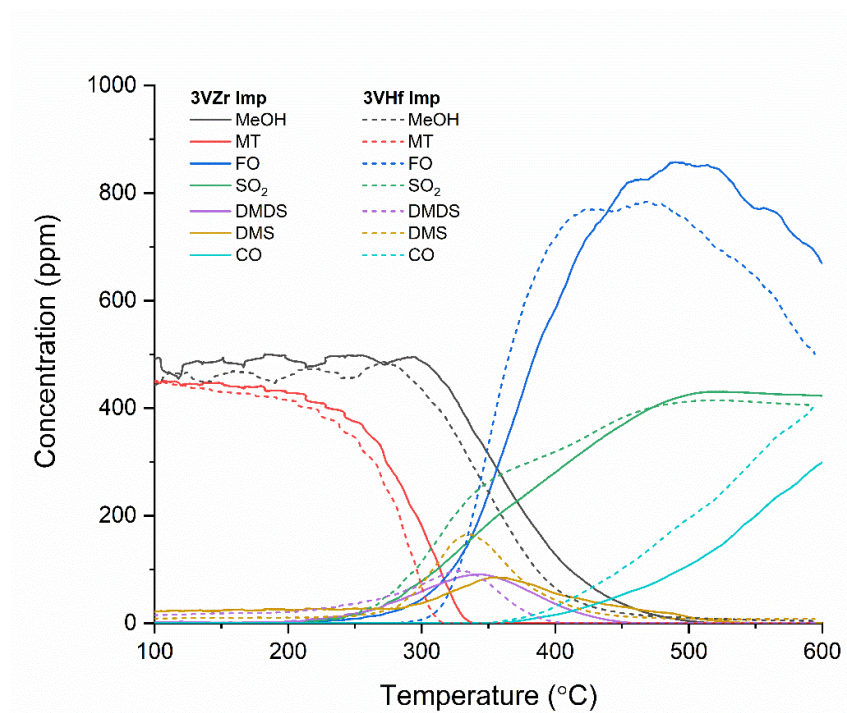

Figure S3: Comparison of 3VZr and 3VHf catalysts; consumptions of reactants and formation of different reaction products.

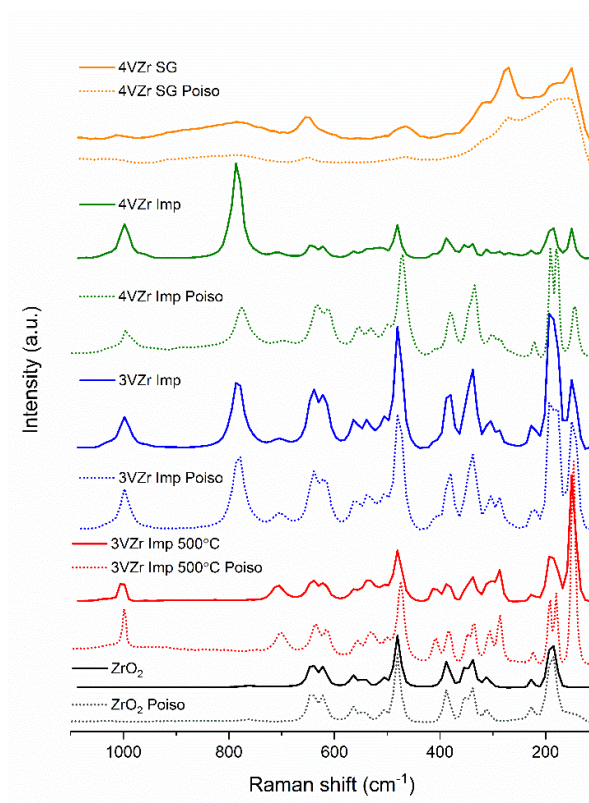

Figure S4: Raman spectra of fresh and poisoned VZr catalysts.

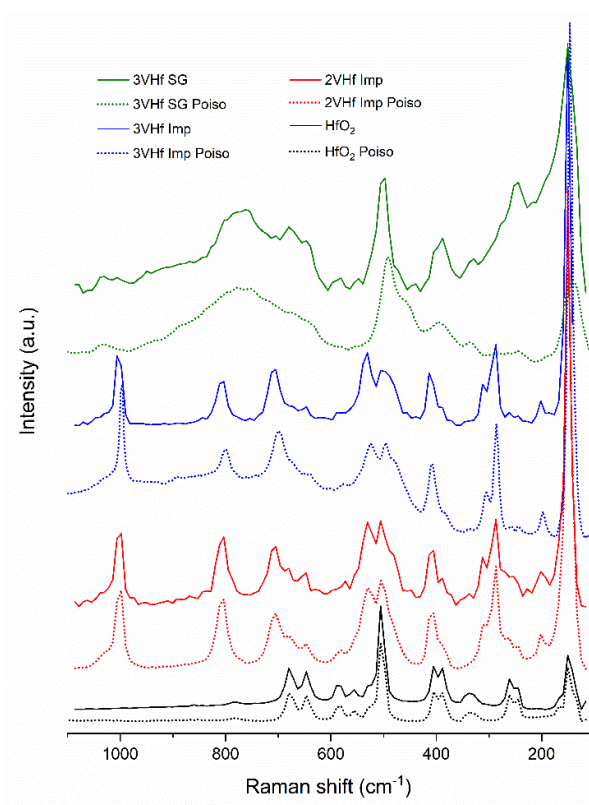

Figure S5: Raman spectra of fresh and poisoned VHf catalysts.

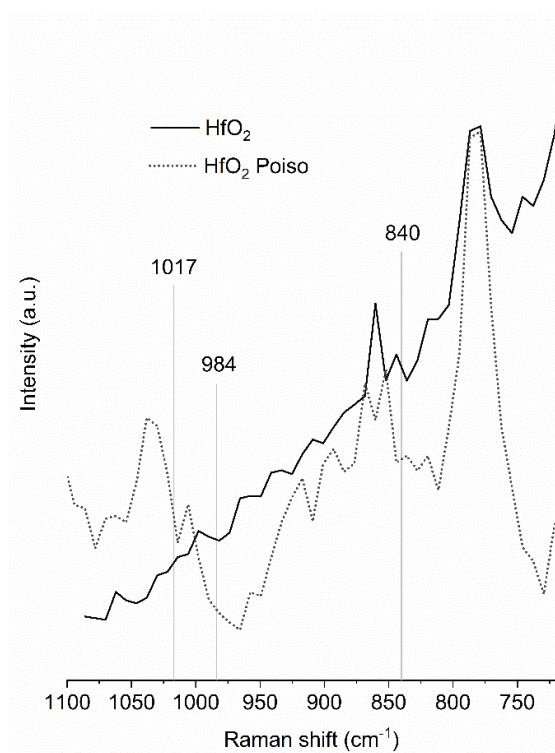

Figure S6: Raman spectrum of fresh and poisoned HfO<sub>2</sub> support in the spectral range of 700–1100 cm<sup>-1</sup>.

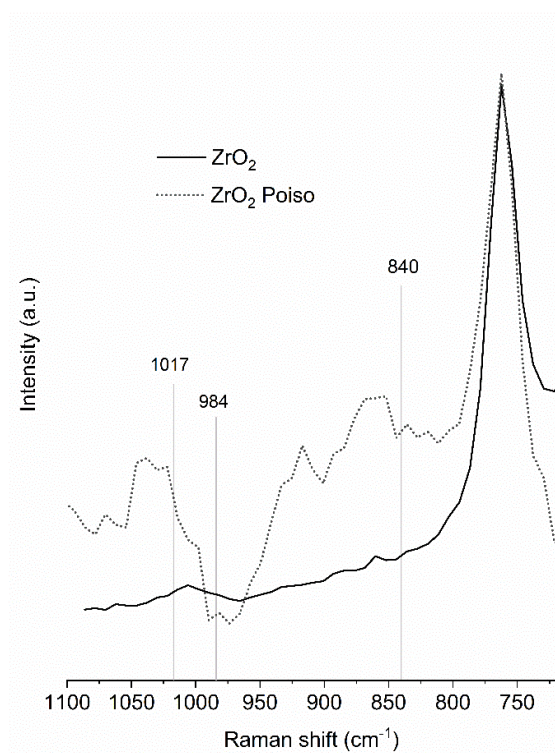

Figure S7: Raman spectrum of fresh and poisoned ZrO<sub>2</sub> support in the spectral range of 700–1100 cm<sup>-1</sup>.



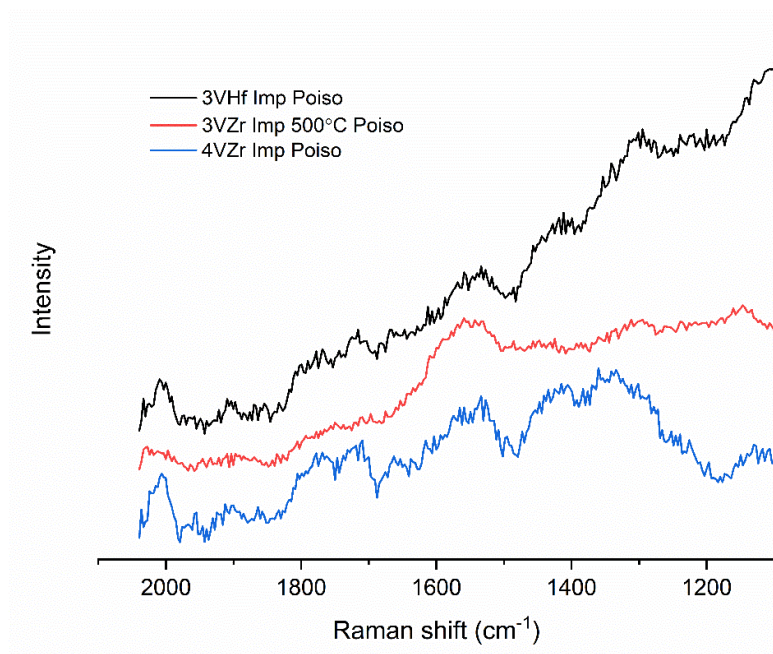

Figure S8: Raman spectra of poisoned 3VHf, 3VZr and 4VZr catalysts in Raman shift range of 1100–2100  $\text{cm}^{-1}$ .

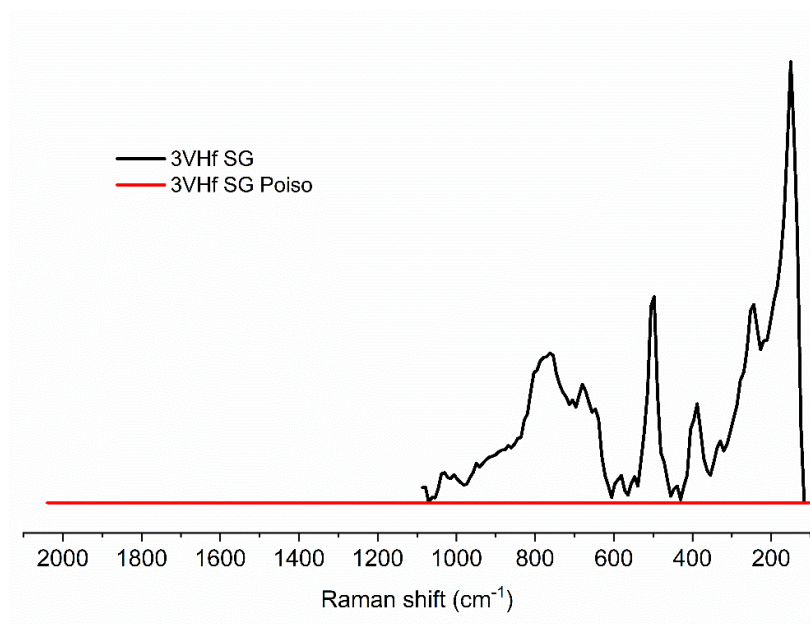

Figure S9: Raman spectra of fresh and poisoned 3VHf SG catalyst. Y-axis is similar for both the spectra.

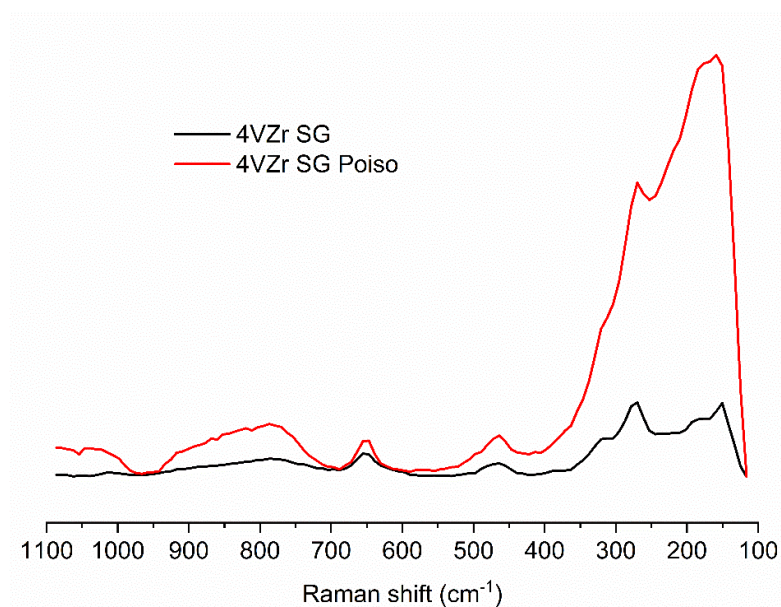

Figure S10: Raman spectra of fresh and poisoned 4VZr SG catalyst. Y-axis is similar for both the spectra.

Table S1: Selectivity of formaldehyde at indicated reaction temperature. Temperatures are given with 5 °C accuracy and selectivities given with 1% accuracy.

| Catalyst        | Temperature at Maximum Selectivity | Maximum Selectivity | Temperature at Maximum Formaldehyde Production | Selectivity at Maximum Formaldehyde Production |
|-----------------|------------------------------------|---------------------|------------------------------------------------|------------------------------------------------|
| 4VZr SG         | 375                                | 63                  | 395                                            | 63                                             |
| 4VZr Imp        | 445                                | 63                  | 495                                            | 63                                             |
| 3VZr Imp        | 450                                | 62                  | 485                                            | 60                                             |
| 3VZr Imp 500 °C | 475                                | 61                  | 505                                            | 62                                             |
| 3VHf SG         | 370                                | 57                  | 390                                            | 55                                             |
| 3VHf Imp        | 405                                | 62                  | 465                                            | 58                                             |
| 2VHf Imp        | 415                                | 60                  | 470                                            | 59                                             |
